# Supplementary material for: CircFAM114A2 Inhibits Bladder Cancer Proliferation and Promotes Cisplatin Sensitivity via the miR-222-3p/P27 and miR-146a-5p/P21 Cascades
Source: Research Square preprint supplement (doi:10.21203/rs.3.rs-108114/v1), 2020-11-19
Supplement: Supplementary file 1 [file 85c746f212f0ab85b445ac25.docx]

**Additional table 2:** All PCR primer used in this research

| **Primers and probes** |  | **sequence** |
| --- | --- | --- |
| CircFAM114A2 | Forward  Reverse | 5’-GGGGCAAGTCCATACT-3’  5’-TTGGCTGGCTCACAG-3’ |
| FAM114A2 | Forward  Reverse | 5’-ACTGCTGTTCAGAGCACAGG-3’  5’-CCTTCTGCTATCACATCCATTGT-3’ |
| miR-222-3p (mimics)  miR-146a-5p (mimics)  U6  P27  P21  β-Actin  GADPH | Forward  Reverse  Stem-loop primer  Forward  Reverse  Stem-loop primer  Forward  Reverse  Forward  Reverse  Forward  Reverse  Forward  Reverse  Forward  Reverse | 5’-CGGCACGGGCCGAGGC-3’  5’-AGTGCAGGGTCCGAGGTATT-3’  5’-GTCGTATCCAGTGCAGGGTCCGAGGTATTCGCACTGGATACGACGCTGGT-3’  5’-GTTCTTCAGCTGGGATATCTCTGT-3’  5’-AGTGCAGGGTCCGAGGTATT-3’  5’-GTCGTATCCAGTGCAGGGTCCGAGGTATTCGCACTGGATACGACACGATG-3’  5’-AAAGCAAATCATCGGACGACC-3’  5’-GTACAACACATTGTTTCCTCGGA-3’  5’-AACGTGCGAGTGTCTAACGG-3’  5’-CCCTCTAGGGGTTTGTGATTCT-3’  5’-TGTCCGTCAGAACCCATGC-3’  5’-AAAGTCGAAGTTCCATCGCTC-3’  5’-CTCCATCCTGGCCTCGCTGT-3’  5’-GCTGTCACCTTCACCGTTCC-3’  5’-CAATGACCCCTTCATTGACC-3’  5’-GACAAGCTTCCCGTTCTCAG-3’ |
